# Supplementary material for: Stroke severity quantification by critical care physicians in a mobile stroke unit
Source: PubMed Central journal article supplement — Eur J Emerg Med. 2017 Dec 14;26(3):194–8. doi: 10.1097/MEJ.0000000000000529 (PMC6504122; doi:10.1097/mej.0000000000000529), 2017-12-14
Supplement: ejem-26-194-s001.pdf [file ejem-26-194-s001.pdf]

| Item number and name                                       | Scoring and guide                                                                                                                                                                                                                                                                                                                                     |
|------------------------------------------------------------|-------------------------------------------------------------------------------------------------------------------------------------------------------------------------------------------------------------------------------------------------------------------------------------------------------------------------------------------------------|
| <b>1. Level of consciousness</b>                           | 0 = alert; keenly responsive<br>1 = not alert; but arousable by minor stimulation to obey, answer, or respond<br>2 = not alert; requires repeated stimulation to attend<br>3 = responds only with reflex motor or autonomic effects or totally unresponsive                                                                                           |
| <b>b. Questions to level of consciousness (month, age)</b> | 0 = answers both questions correctly<br>1 = answers one question correctly<br>2 = answers neither question correctly                                                                                                                                                                                                                                  |
| <b>c. Commands to level of consciousness</b>               | (open/close eyes, make fist/let go)<br>0 = performs both tasks correctly<br>1 = performs one task correctly<br>2 = performs neither task correctly                                                                                                                                                                                                    |
| <b>2. Best Gaze</b>                                        | <b>(eyes open, patient follows examiner's finger)</b><br>0 = normal<br>1 = partial gaze palsy; gaze is abnormal in one or both eyes<br>2 = forced deviation, or total gaze paresis                                                                                                                                                                    |
| <b>3. Visual fields</b>                                    | 0 = no visual loss<br>1 = partial hemianopia<br>2 = complete hemianopia<br>3 = bilateral hemianopia (blind including cortical blindness)                                                                                                                                                                                                              |
| <b>4. Facial paresis</b>                                   | <b>(show teeth, raise eyebrows and squeeze eyes shut)</b><br>0 = normal symmetrical movements<br>1 = minor paralysis (flattened nasolabial fold, asymmetry on smiling)<br>2 = partial paralysis (total or near-total paralysis of lower face)<br>3 = complete paralysis of one or both sides (absence of facial movement in the upper and lower face) |
| <b>5. 6. Motor: arm and leg</b>                            |                                                                                                                                                                                                                                                                                                                                                       |
| <b>5a. / 6a. Left</b>                                      | 0 = no drift; limb holds 90 (or 45) degrees for full 10 seconds                                                                                                                                                                                                                                                                                       |
| <b>5b. right</b>                                           | 1 = drift; limb holds 90 (or 45) degrees, but drifts down before full 10 seconds<br>2 = some effort against gravity; limb cannot get to or maintain (if cued) 90 (or 45) degrees, drifts down to bed<br>3 = no effort against gravity; limb falls<br>4 = no movement                                                                                  |
| <b>7. Limb ataxia</b>                                      | 0 = absent<br>1 = present in one limb<br>2 = present in two limbs                                                                                                                                                                                                                                                                                     |
| <b>8. Sensory</b>                                          | 0 = normal; no sensory loss<br>1 = mild-to-moderate sensory loss<br>2 = severe to total sensory loss                                                                                                                                                                                                                                                  |
| <b>9. Best language</b>                                    | 0 = no aphasia; normal<br>1 = mild-to-moderate aphasia<br>2 = severe aphasia<br>3 = mute, global aphasia; no usable speech or auditory comprehension                                                                                                                                                                                                  |
| <b>10. Dysarthria</b>                                      | 0 = normal<br>1 = mild-to-moderate dysarthria; patient slurs at least some words<br>2 = severe dysarthria                                                                                                                                                                                                                                             |
| <b>11. Extinction and inattention</b>                      | 0 = no abnormality<br>1 = visual, tactile, auditory, spatial, or personal inattention or extinction to bilateral simultaneous stimulation in one of the sensory modalities<br>2 = profound hemi-inattention or extinction to more than one modality; does not recognize own hand or orients to only one side of space                                 |
