# Supplementary material for: Stroke severity quantification by critical care physicians in a mobile stroke unit
Source: PubMed Central journal article supplement — Eur J Emerg Med. 2017 Dec 14;26(3):194–8. doi: 10.1097/MEJ.0000000000000529 (PMC6504122; doi:10.1097/mej.0000000000000529), 2017-12-14
Supplement: ejem-26-194-s002.pdf [file ejem-26-194-s002.pdf]

|           | <b>Radiological<br/>diagnose<br/>MSU</b> | <b>Prehospital<br/>NIHSS</b> | <b>Radiological<br/>diagnose<br/>at hospital</b> | <b>Additional<br/>information</b>                                                                                                                                                               |
|-----------|------------------------------------------|------------------------------|--------------------------------------------------|-------------------------------------------------------------------------------------------------------------------------------------------------------------------------------------------------|
| <b>1</b>  | Intracranial hemorrhage                  | 5                            | Intracranial hemorrhage                          | Direct transfer to a neurosurgical care unit from the MSU.                                                                                                                                      |
| <b>2</b>  | Cerebral ischemia                        | 28                           | Cerebral ischemia                                | Impressive aphasia and neglect, known epilepsy and recent attack. Considered as an epileptic seizure by the on-call neurologist.                                                                |
| <b>3</b>  | Cerebral ischemia                        | 15                           | Other                                            | Focal neurological symptoms and reduced consciousness (GCS 13), no indication for thrombolysis. Considered as a non-neurological by the on-call neurologist.                                    |
| <b>4</b>  | Cerebral ischemia                        | 4                            | Cerebral ischemia                                | MSU anesthesiologist found symptoms of focal neurology, which were in rapid regression. Not considered as an acute stroke by the on-call neurologist.                                           |
| <b>5</b>  | Cerebral ischemia                        | 32                           | Cerebral ischemia                                | MSU anesthesiologist described severe focal neurological symptoms. However, the patient is not eligible for thrombolysis due to co-morbidity (liver cancer). NIHSS data missing from admission. |
| <b>6</b>  | Intracranial hemorrhage                  | 22                           | Intracranial hemorrhage                          | Transfer from the local hospital to the regional hospital and neurosurgical care.                                                                                                               |
| <b>7</b>  | Intracranial hemorrhage                  | 19                           | Intracranial hemorrhage                          | Direct transfer to neurosurgical care unit from the MSU.                                                                                                                                        |
| <b>8</b>  | Intracranial hemorrhage                  | 18                           | Intracranial hemorrhage                          | Direct transfer to neurosurgical care unit from the MSU.                                                                                                                                        |
| <b>9</b>  | Intracranial hemorrhage                  | 13                           | Intracranial hemorrhage                          | Direct transfer to neurosurgical care unit from the MSU.                                                                                                                                        |
| <b>10</b> | Cerebral ischemia                        | 20                           | Intracranial hemorrhage                          | Transfer from the local hospital to the regional hospital and neurosurgical care.                                                                                                               |
| <b>11</b> | Intracranial hemorrhage                  | 5                            | Cerebral ischemia                                | NIHSS data missing from admission.                                                                                                                                                              |
| <b>12</b> | Cerebral ischemia                        | 0                            | Intracranial hemorrhage                          | Direct transfer to neurosurgical care unit from the MSU.                                                                                                                                        |
| <b>13</b> | Cerebral ischemia                        | 8                            | Cerebral ischemia                                | NIHSS data missing from admission. The patient had symptoms of reduced consciousness and thrombolytic therapy was not considered in the MSU.                                                    |
| <b>14</b> | Cerebral Ischemia                        | 15                           | Cerebral Ischemia                                | NIHSS data missing from admission                                                                                                                                                               |
